# Supplementary material for: Development of a Mechanistic Hypothesis Linking Compensatory Biomechanics and Stepping Asymmetry during Gait of Transfemoral Amputees
Source: Hindawi journal article supplement (doi:10.1155/2019/4769242), 2019-02-03

### **S3 – External work rate on CoM and Internal work rate of joints**

**S3 Fig 1. External work on the body CoM during the gait cycle.** Data are shown for amputee with C-Leg prosthesis (A=slow, B=normal, C=fast) and amputee with Mauch prosthesis (D=slow, E=normal, F=fast). In each panel the first column of plots shows gravity work rate (power) on center of mass (CoM), and 2nd column shows impulse work rate (power) on CoM. The first row shows Case 1 where intact limb is push-off limb (blue) and Case 2 where push-off limb is prosthesis (red line). Means for control subjects (N=14) is shown by dark solid lines with shaded boundaries that represent +/- 1 standard deviation from the mean at each % cycle. Vertical solid lines represent toe off time of the ipsilateral limb, and the dashed vertical lines represent heel strike of the contralateral limb, and the shaded boundaries represent +/- 1 standard deviation in event time. The horizontal axis shows 0-100% gait cycle.

**S3 Fig 2. Internal work of joints during the gait cycle.** Data are shown for amputee with C-Leg prosthesis (A=slow, B=normal, C=fast) and amputee with Mauch prosthesis (D=slow, E=normal, F=fast). In each panel the first column of plots shows ankle power, and 2nd column shows knee power, and the 3rd column shows hip power. The first row shows Case 1 where intact limb is push-off limb (blue) and Case 2 where push-off limb is prosthesis (red line). Means for control subjects (N=14) is shown by dark solid lines with shaded boundaries that represent +/- 1 standard deviation from the mean at each % cycle. Vertical solid lines represent toe off time of the ipsilateral limb, and the dashed vertical lines represent heel strike of the contralateral limb, and the shaded boundaries represent +/- 1 standard deviation in event time. The horizontal axis shows 0-100% gait cycle.

Figure S3.1(A)

**External work on CoM for C-Leg at Slow speed**

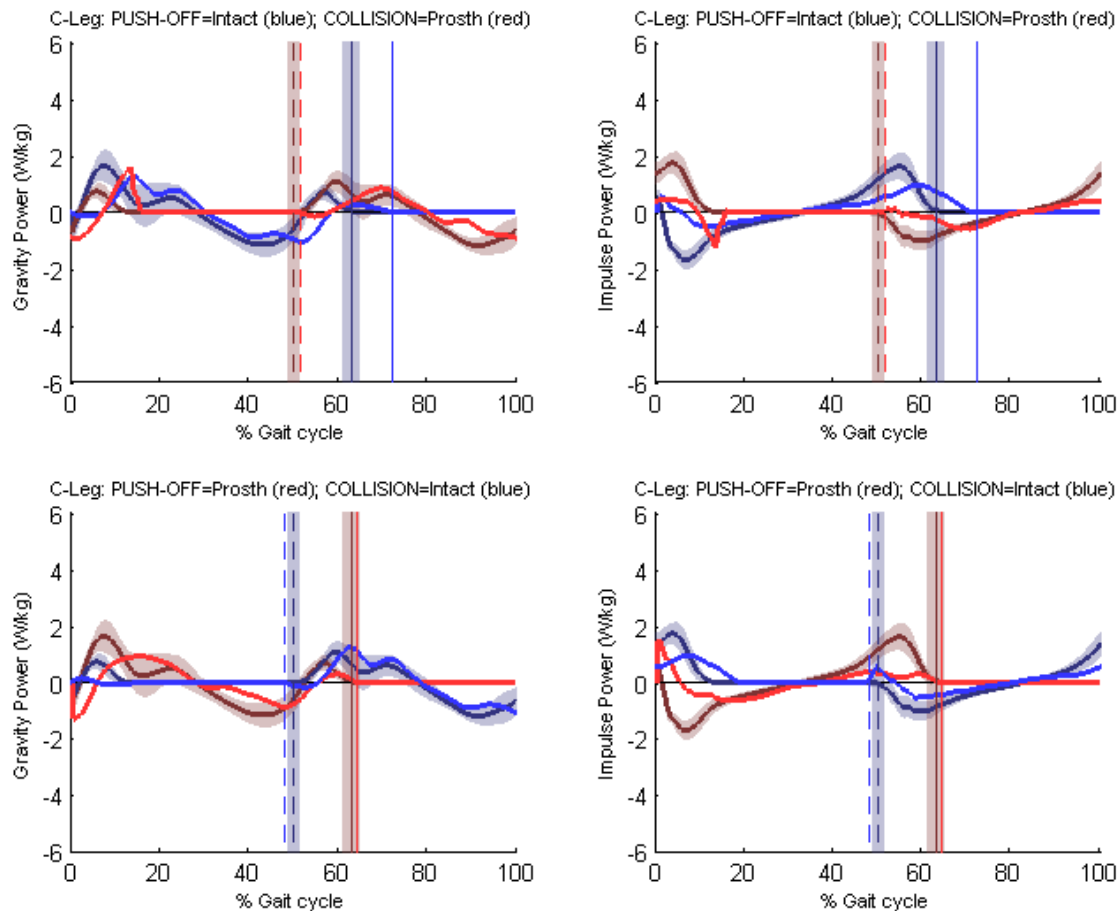

Figure S3.1(B)

**External work on CoM for C-Leg at Normal speed**

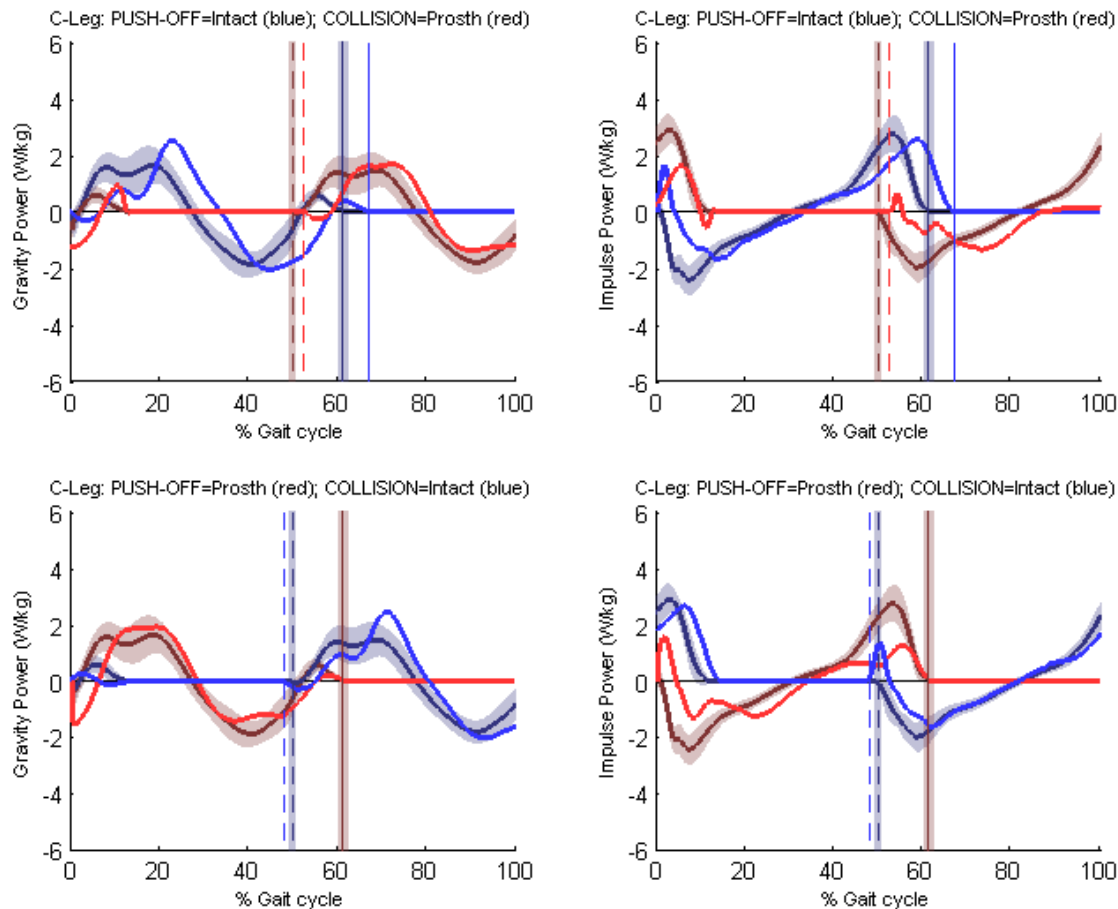

Figure S3.1(C)

**External work on CoM for C-Leg at Fast speed**

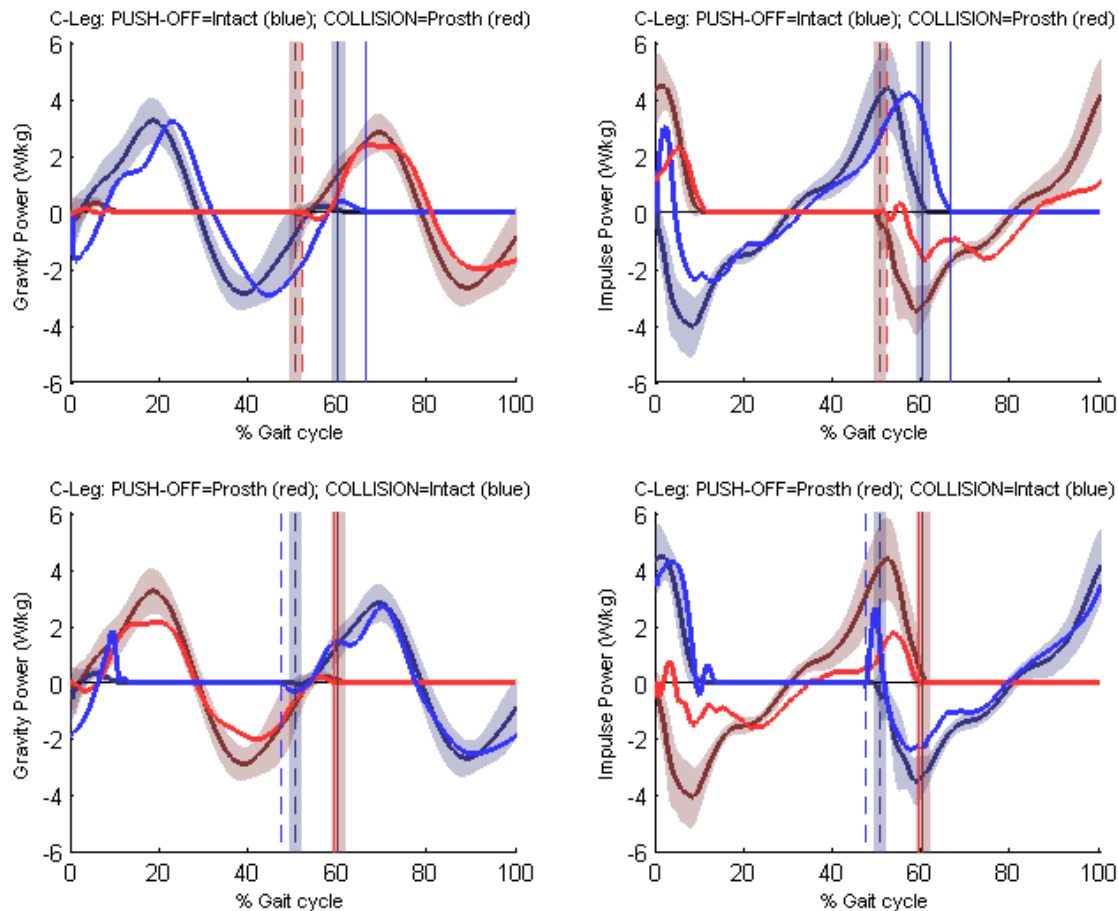

Figure S3.1(D)

**External work on CoM for Mauch knee at Slow speed**

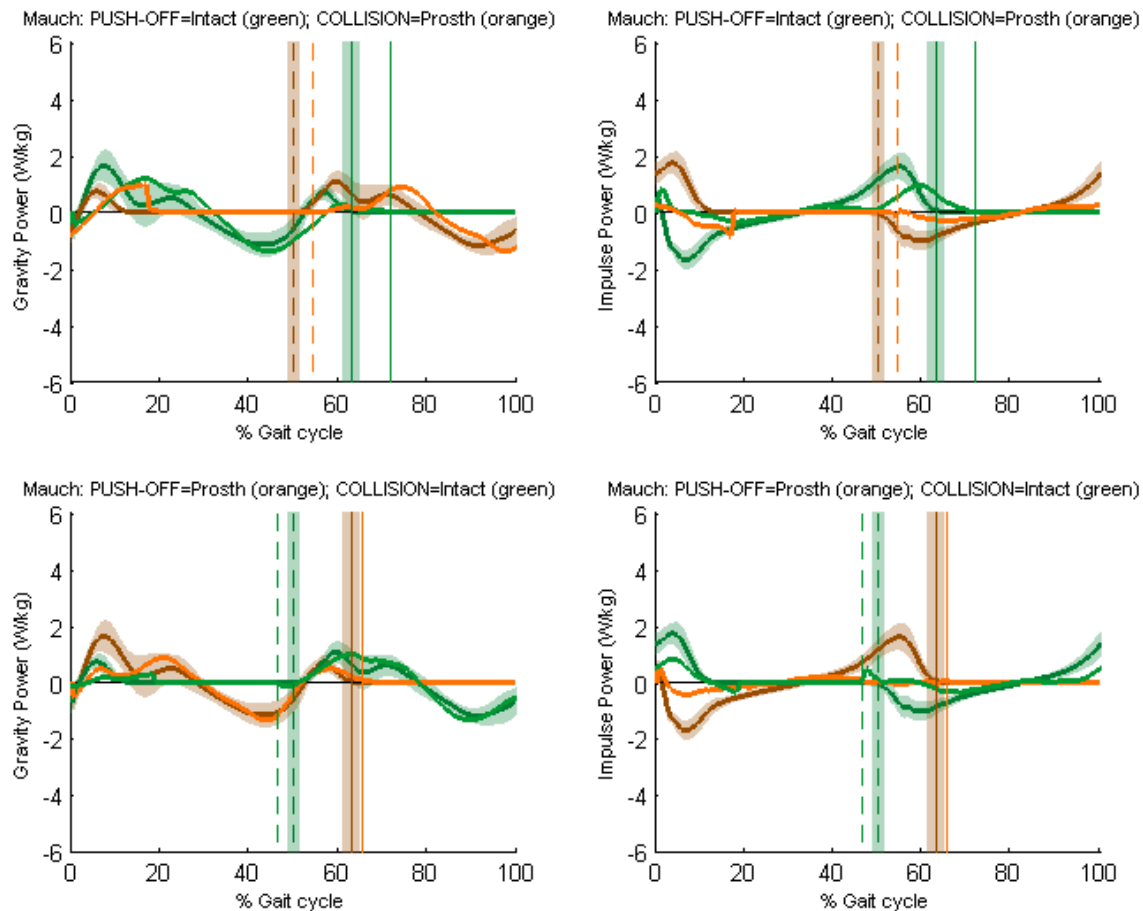

Figure S3.1(E)

**External work on CoM for Mauch knee at Normal speed**

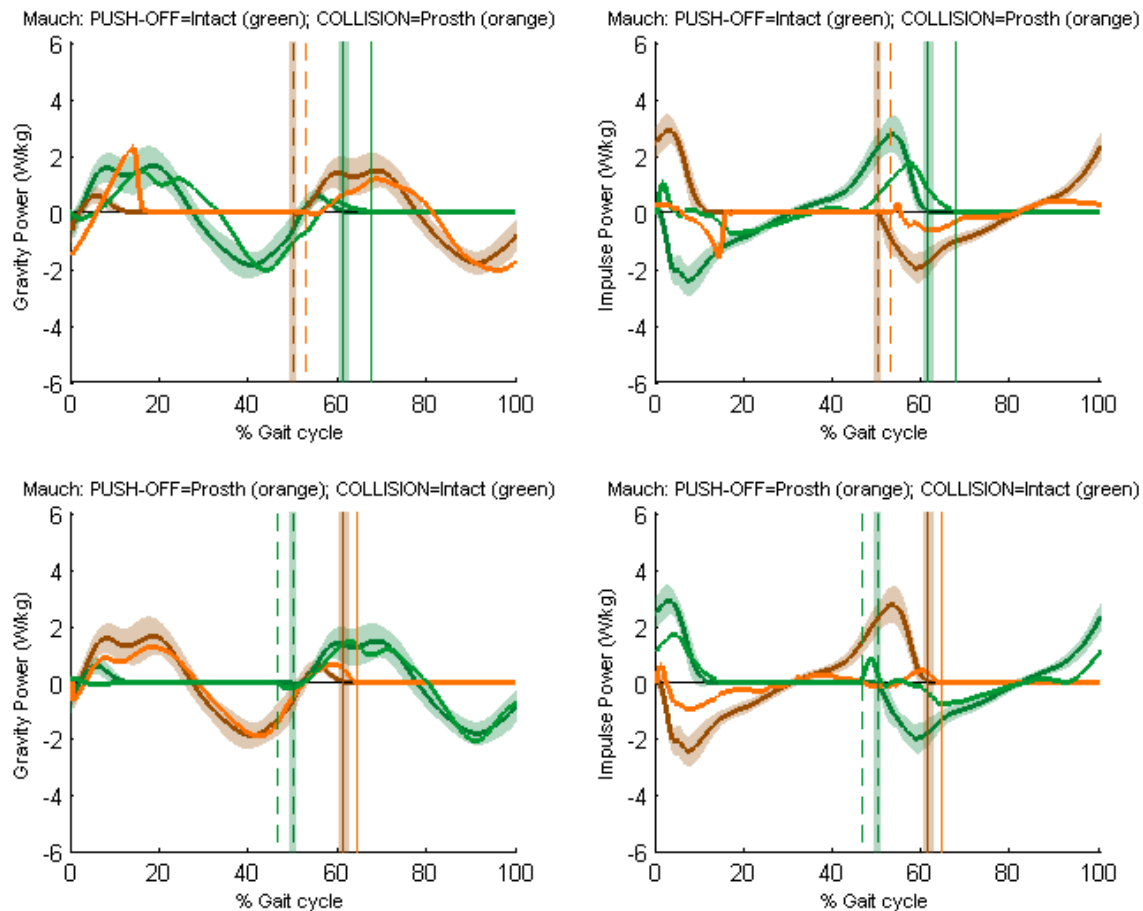

Figure S3.1(F)

**External work on CoM for Mauch knee at Fast speed**

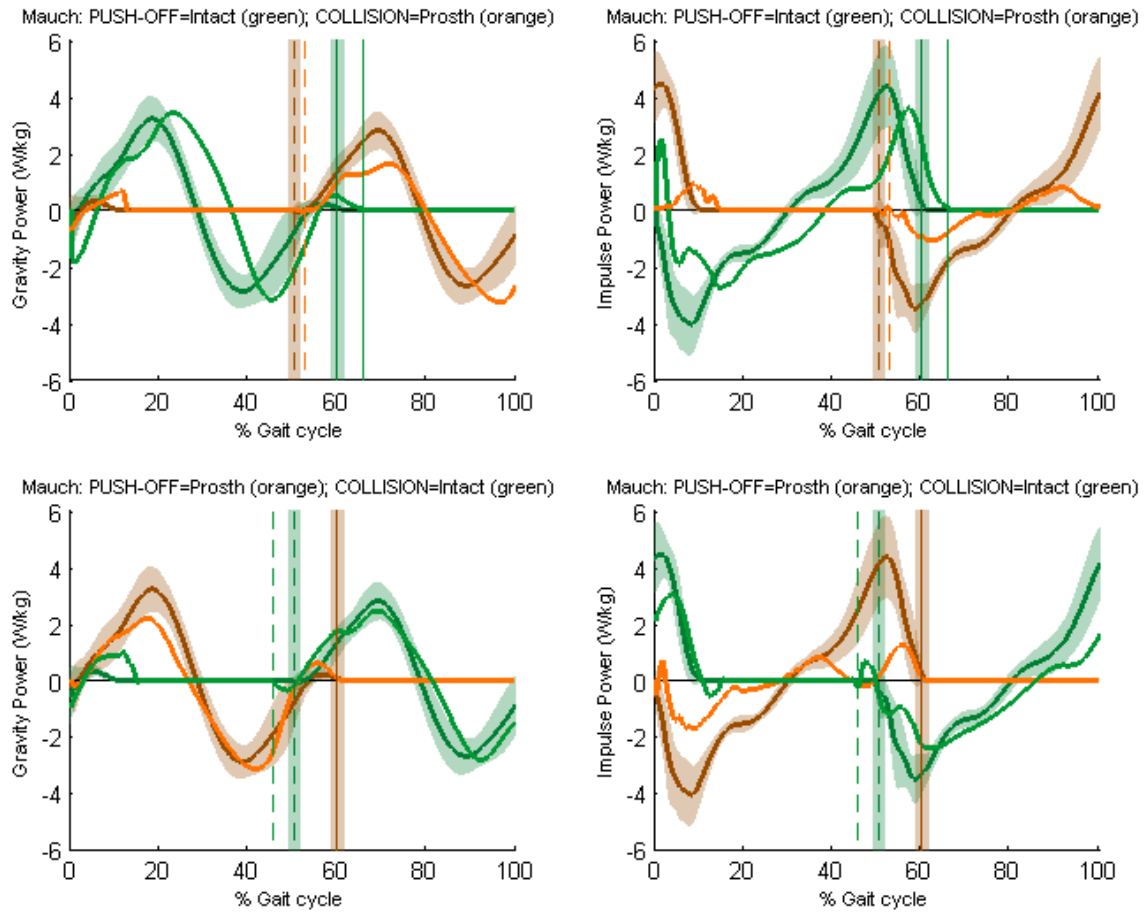

Figure S3.2(A)

**Internal joint work for C-Leg at Slow speed**

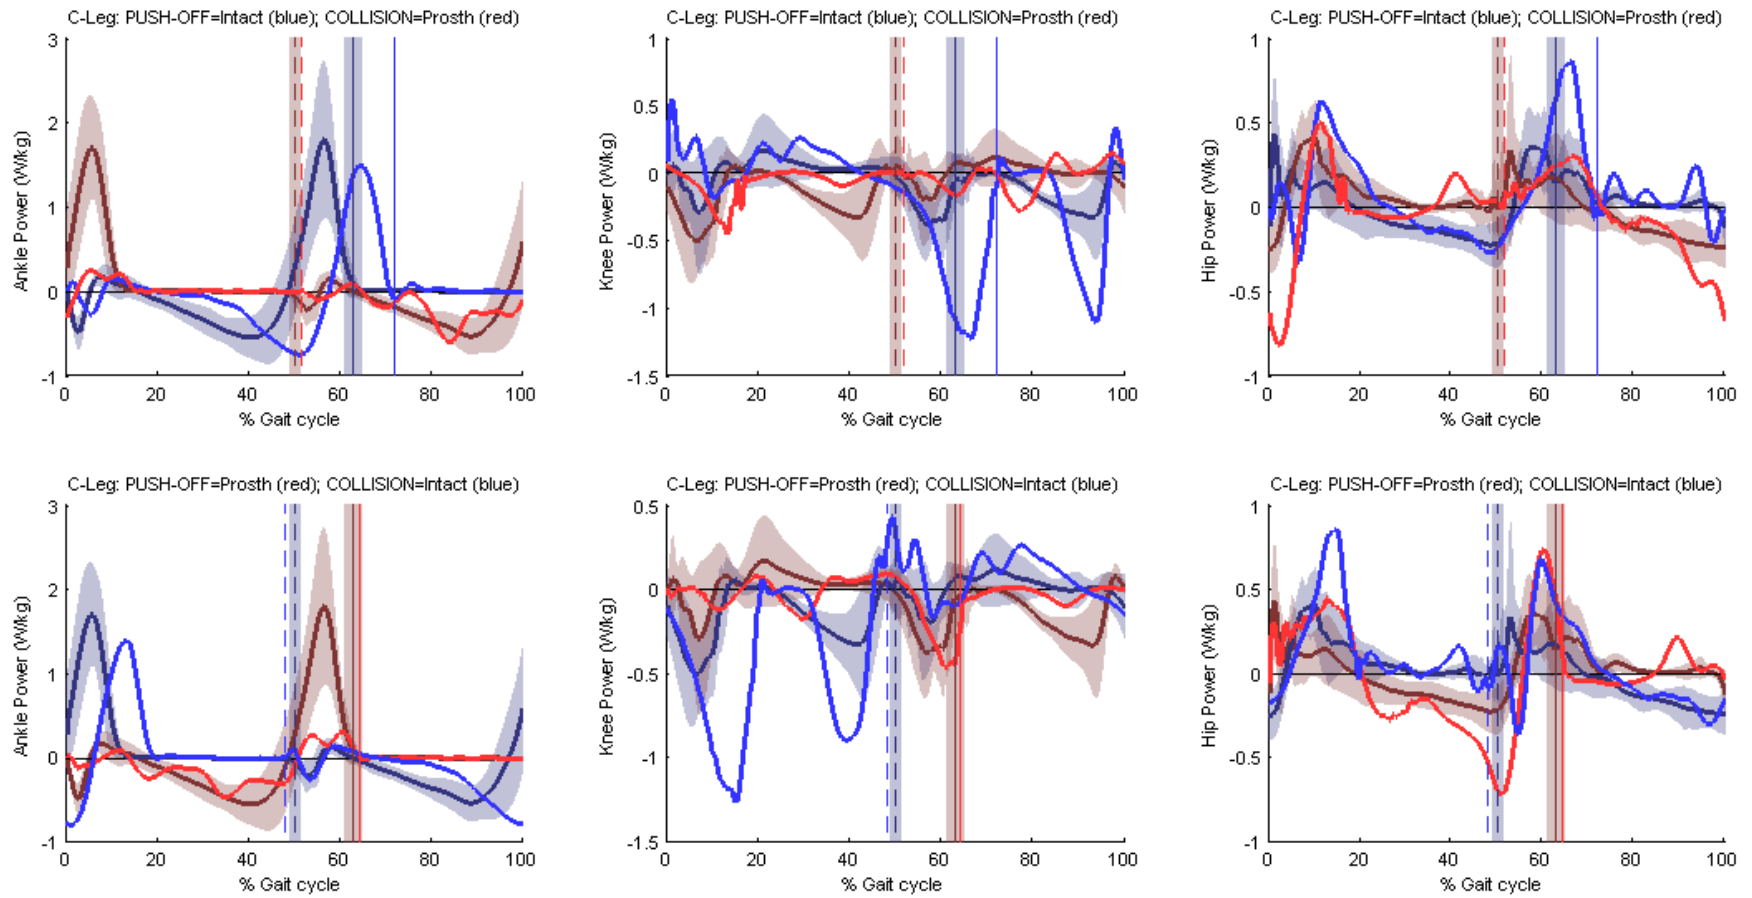



Figure S3.2(B)

**Internal joint work for C-Leg at Normal speed**

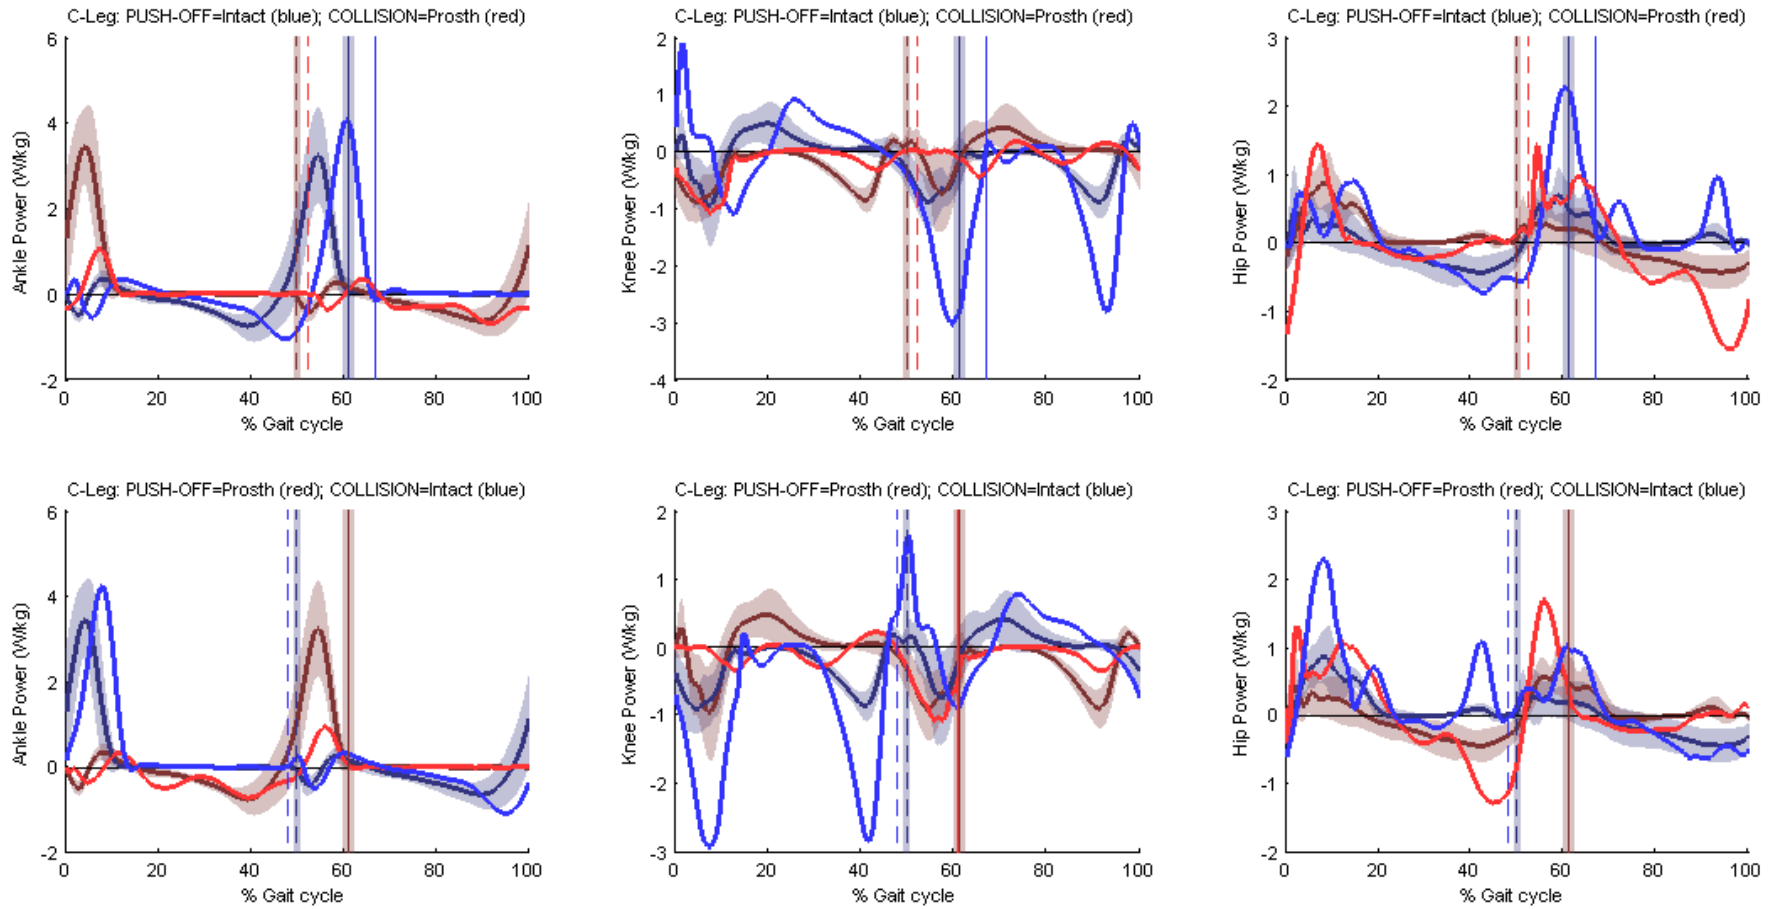

Figure S3.2(C)

**Internal joint work for C-Leg at Fast speed**

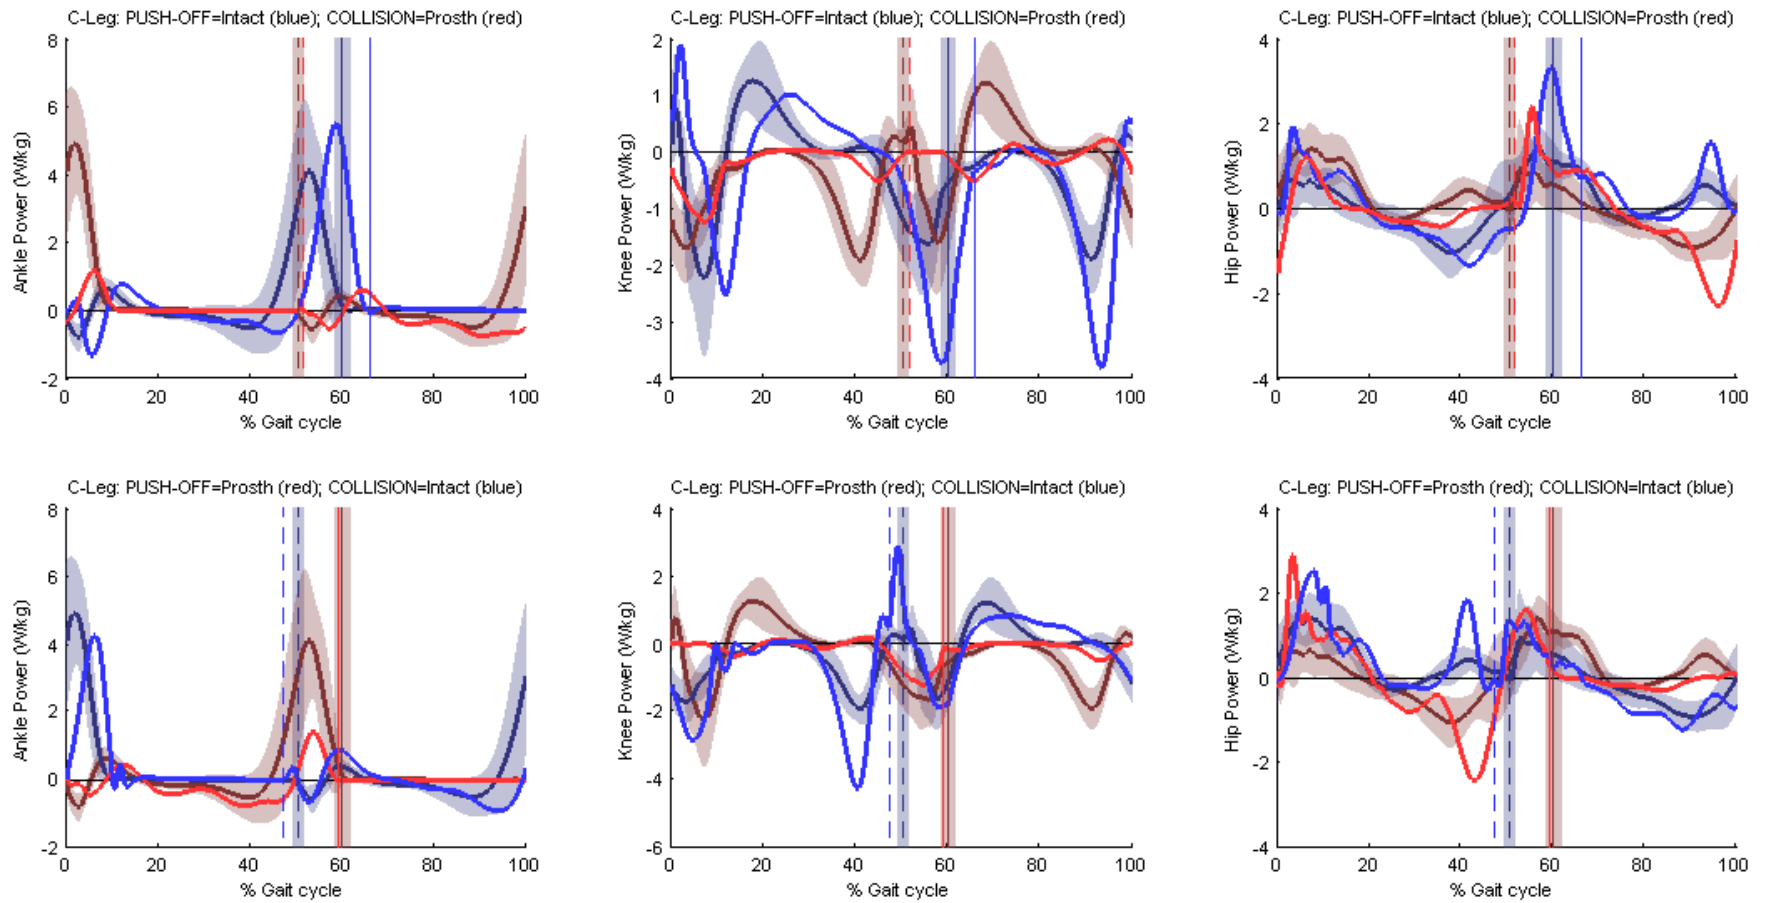

Figure S3.2(D)

Internal joint work for Mauch knee at Slow speed

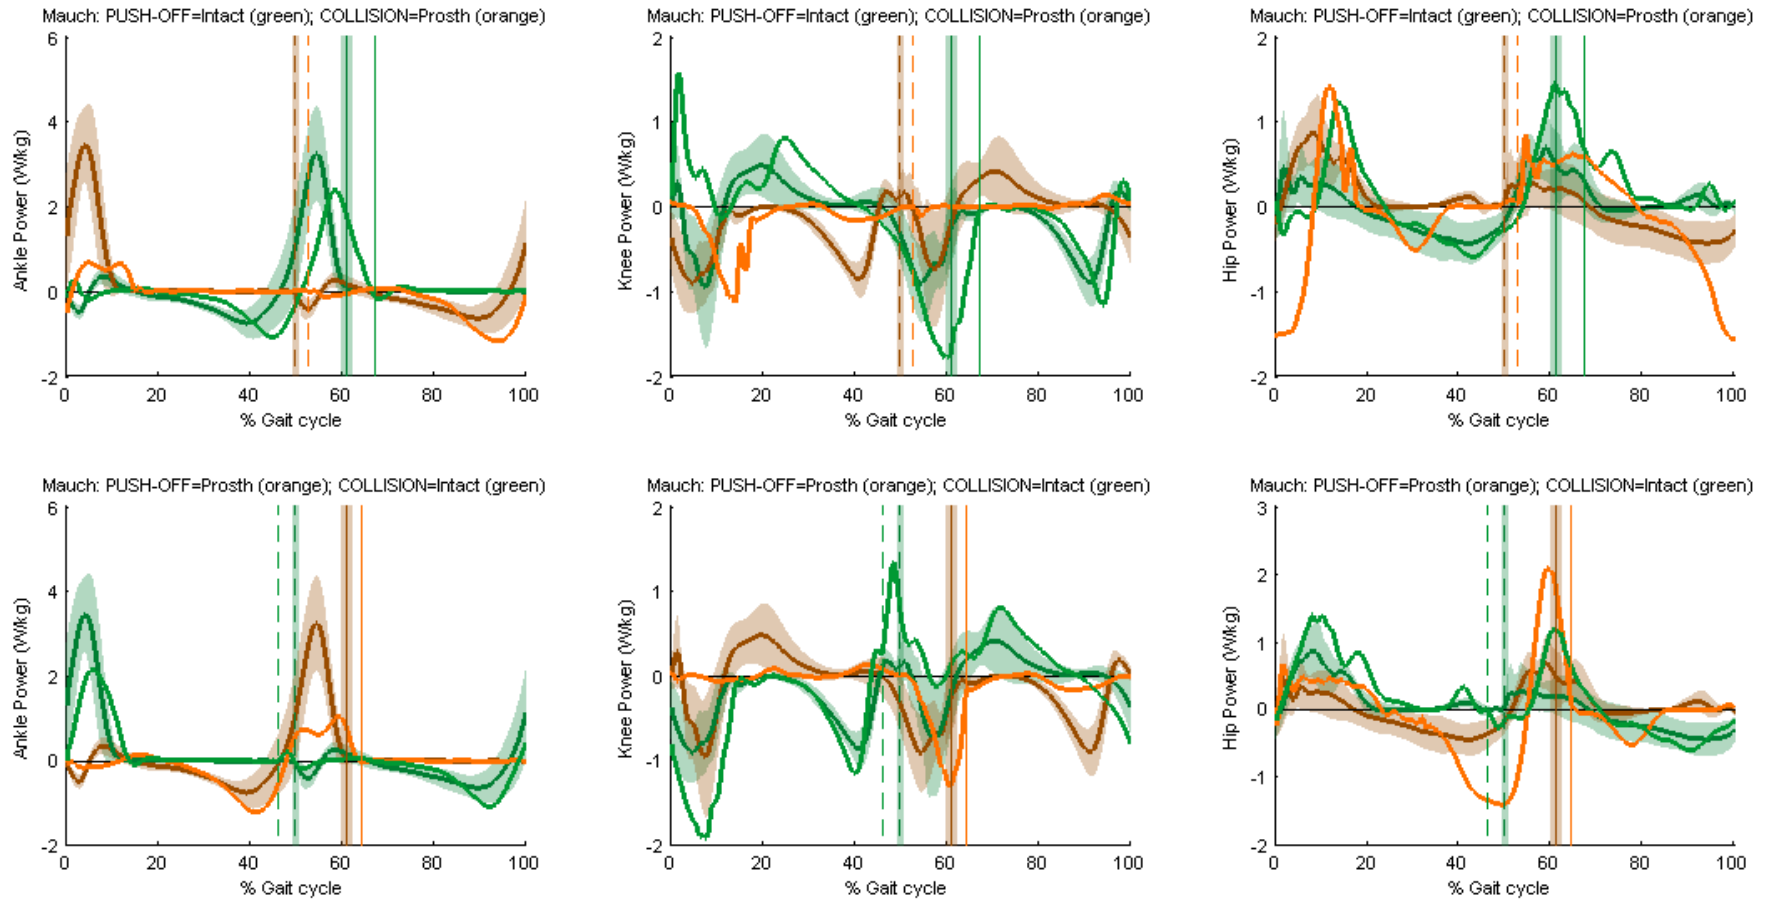

Figure S3.2(E)

**Internal joint work for Mauch knee at Normal speed**

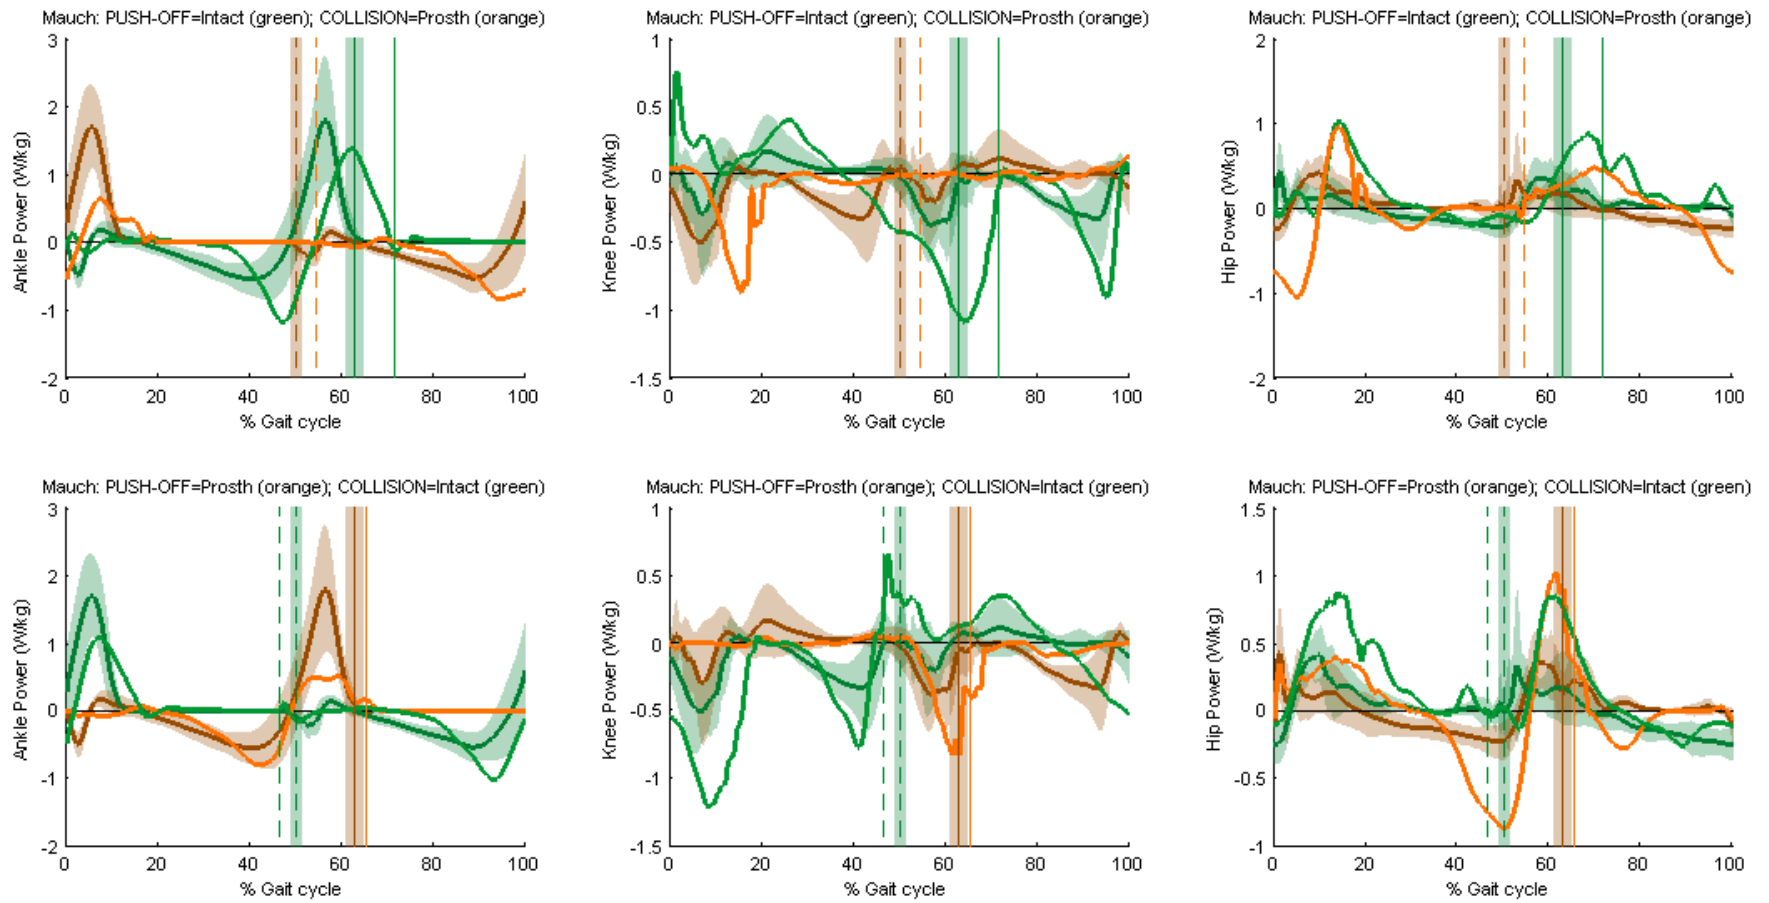

Figure S3.2(F)

Internal joint work for Mauch knee at Fast speed

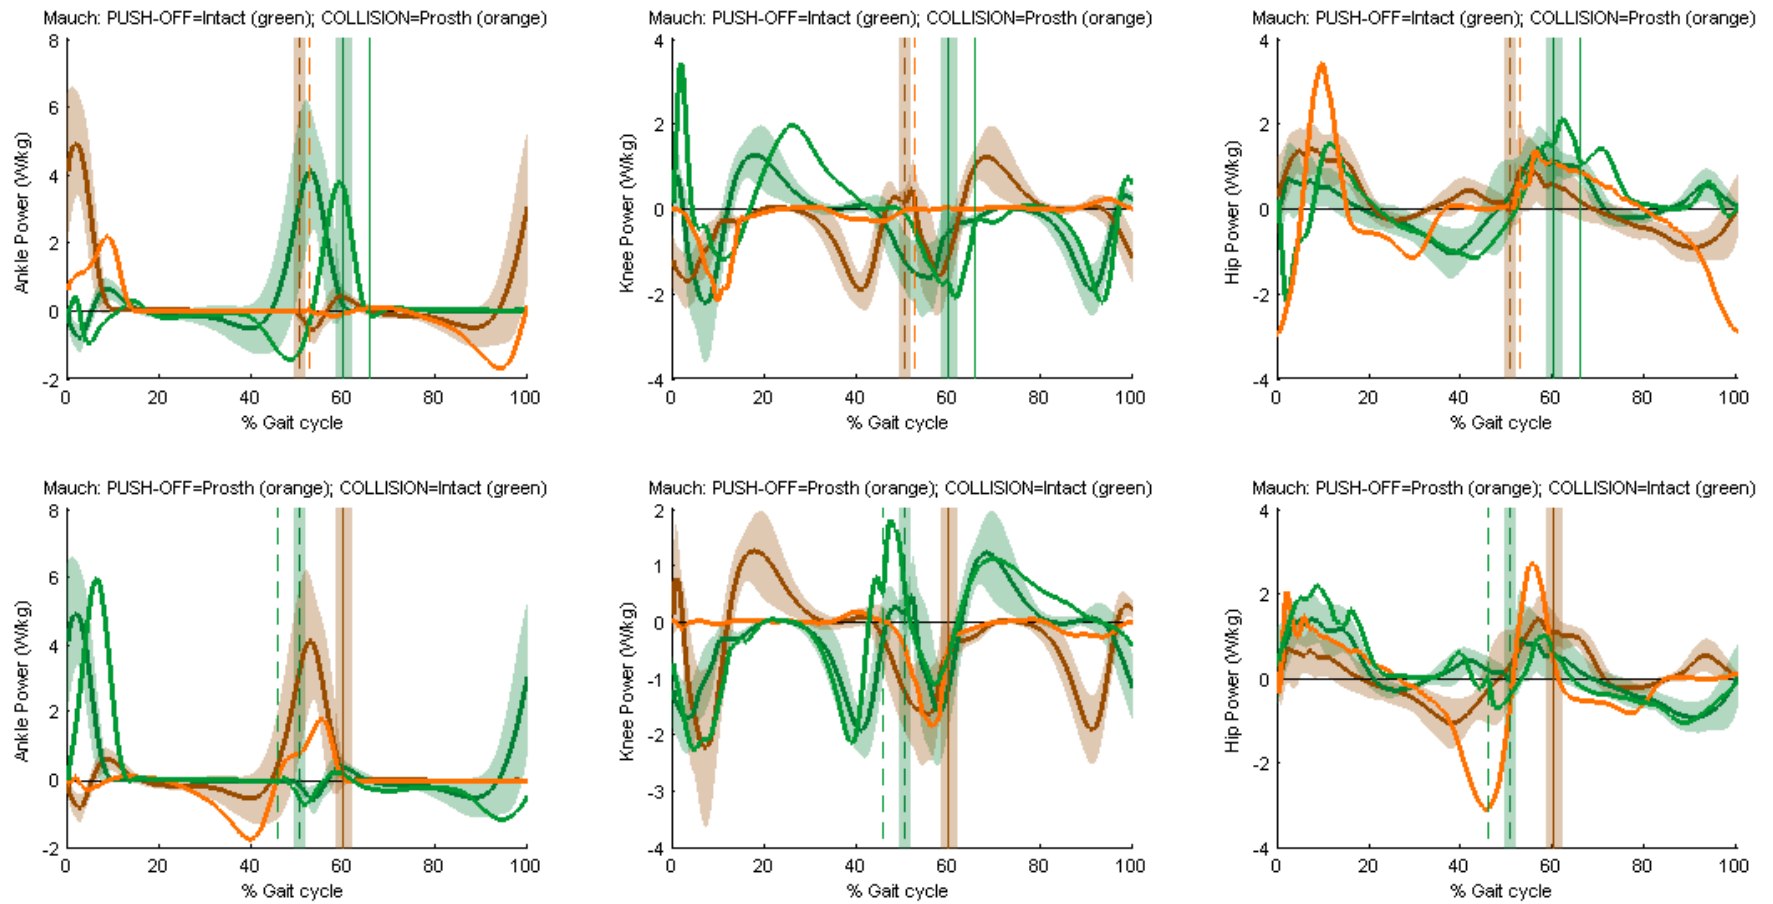

Supplement: f3 [file 4769242.f3.pdf]
